# Supplementary material for: Model System for the Formation of Tick-Borne Encephalitis Virus Replication Compartments without Viral RNA Replication
Source: PubMed Central journal article supplement (PMC6714791; doi:10.1128/jvi.00292-19), 2019-08-28
Supplement: JVI.00292-19-s0003.pdf [file JVI.00292-19-s0003.pdf]

## **Supplemental material**

### **Supplementary Movie Legends**

**Supplement Movie S1.** Electron tomography of a pore-like opening connecting RC-like vesicles (magenta) and ER membrane (orange) in dox-induced NSP-GFP cells. Lipid droplet is depicted in grey. Scale bar = 100 nm.

**Supplement Movie S2.** Electron tomography of mitochondria (blue) and dilated ER (orange) in dox-induced NSP-GFP cells. RC-like vesicles (magenta), ER tubules (red), and microtubules (cyan). Scale bar = 100 nm.
